# Supplementary material
Source: MDPI journal article supplement (https://www.mdpi.com/2072-4292/8/10/865)
Supplement: s1 [file s1]

# Supplementary Materials: Using Google Earth Surface Metrics to Predict Plant Species Richness in a Complex Landscape

Sebastián Block, Edgar J. González, J. Alberto Gallardo-Cruz, Ana Fernández, Jonathan V. Solórzano and Jorge A. Meave

**Table S1.** Image metrics calculated for each red band or vegetation index of the SPOT and Google Earth images. Abbreviations:  $i$  and  $j$  stand for pixel values,  $P$  is the probability of finding an  $i$  pixel value (occurrence metrics) or both  $i$  and  $j$  (co-occurrence metrics) inside the window of analysis. Description of the co-occurrence metrics was taken from Gallardo-Cruz et al. (2012) [1].

| Image Metrics                | Formula                                                                          | Description                                                                                                                            |
|------------------------------|----------------------------------------------------------------------------------|----------------------------------------------------------------------------------------------------------------------------------------|
| <i>Co-occurrence metrics</i> |                                                                                  |                                                                                                                                        |
| Mean                         | $cc.mean = \sum_{i,j=0}^{N-1} iP_{i,j}$                                          | Mean of the probability values from the GLCM. It is directly related to the image spectral heterogeneity.                              |
| Variance                     | $cc.var = \sum_{i,j=0}^{N-1} P_{i,j}(i - cc.mean)^2$                             | Measure of the global variation in the image. Large values denote high levels of spectral heterogeneity.                               |
| Correlation                  | $cc.corr = \sum_{i,j=0}^{N-1} P_{i,j} \frac{(i - cc.mean)(j - cc.mean)}{cc.var}$ | Measure of the linear dependency between neighbouring pixels.                                                                          |
| Contrast                     | $cc.cont = \sum_{i,j=0}^{N-1} P_{i,j} (i - j)^2$                                 | Quadratic measure of the local variation in the image. High values indicate large differences between neighbouring pixels.             |
| Dissimilarity                | $cc.diss = \sum_{i,j=0}^{N-1} P_{i,j}  i - j $                                   | Linear measure of the local variation in the image.                                                                                    |
| Homogeneity                  | $cc.hom = \sum_{i,j=0}^{N-1} \frac{P_{i,j}}{1 + (i - j)^2}$                      | Measure of the uniformity of tones in the image. A concentration of high values along the GLCM diagonal denotes to a high homogeneity. |
| Angular second moment        | $cc.asm = \sum_{i,j=0}^{N-1} P_{i,j}^2$                                          | Measure of the order in the image. It is related to the energy required for arranging the elements in the system.                      |
| Entropy                      | $cc.entro = - \sum_{i,j=0}^{N-1} P_{i,j} \ln(P_{i,j})$                           | Measure of the disorder in the image. It is inversely related to ASM.                                                                  |
| <i>Occurrence metrics</i>    |                                                                                  |                                                                                                                                        |
| Mean                         | $st.mean = \sum_{i=0}^{N-1} iP_i$                                                | Statistic mean of the pixel values.                                                                                                    |
| Variance                     | $st.var = \sum_{i=0}^{N-1} (i - st.mean)^2 P_i$                                  | Variability measure of the pixel values.                                                                                               |
| Skewness                     | $st.skew = \frac{1}{(var^2)^{3/2}} \sum_{i=0}^{N-1} (i - st.mean)^3 P_i$         | Asymmetry measure of the pixel values distribution from a normal distribution.                                                         |
| Data range                   | $st.dr = i_{max} - i_{min}$                                                      | Measure of the difference between the extreme values of pixels.                                                                        |
| Entropy                      | $st.entro = - \sum_{i=0}^{N-1} P_i \ln(P_i)$                                     | Measure of repetitiveness of pixel values.                                                                                             |

## Reference

- Gallardo-Cruz, J.A.; Meave, J.A.; González, E.J.; Lebrija-Trejos, E.E.; Romero-Romero, M.A.; Pérez-García, E.A.; Gallardo-Cruz, R.; Hernández-Stefanoni, J.L.; Martorell, C. Predicting tropical dry forest successional attributes from space: Is the key hidden in image texture? *PLoS ONE* **2012**, *7*, e30506.

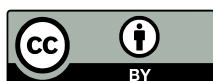

© 2016 by the authors; licensee MDPI, Basel, Switzerland. This article is an open access article distributed under the terms and conditions of the Creative Commons by Attribution (CC-BY) license (<http://creativecommons.org/licenses/by/4.0/>).
